# Supplementary material
Source: Springer Nature journal article supplement (https://www.springermedizin.de/resource/supplementary/12936_2005_158_MOESM6_ESM.pdf/9547018)

4a) Kossodo

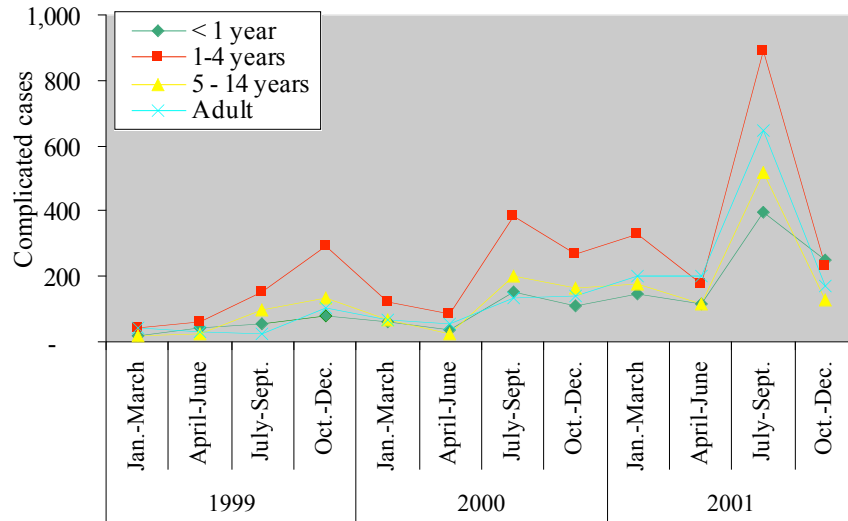

4b) Pissy

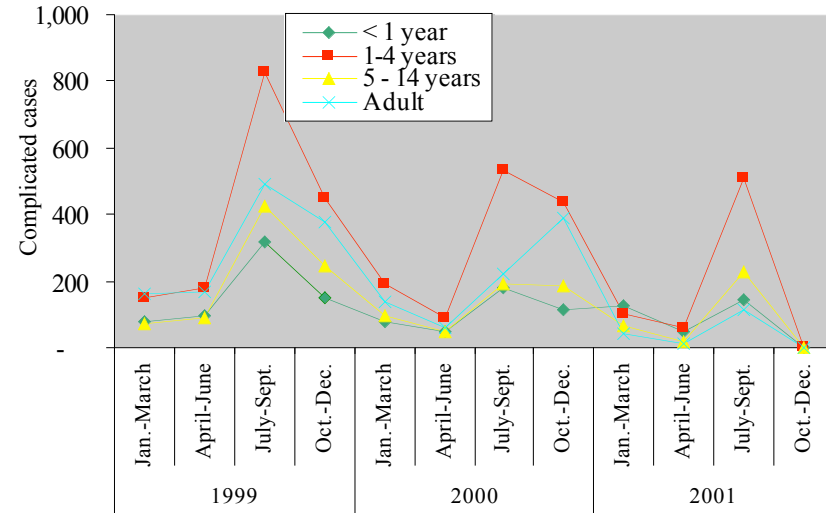

4c) Paul VI

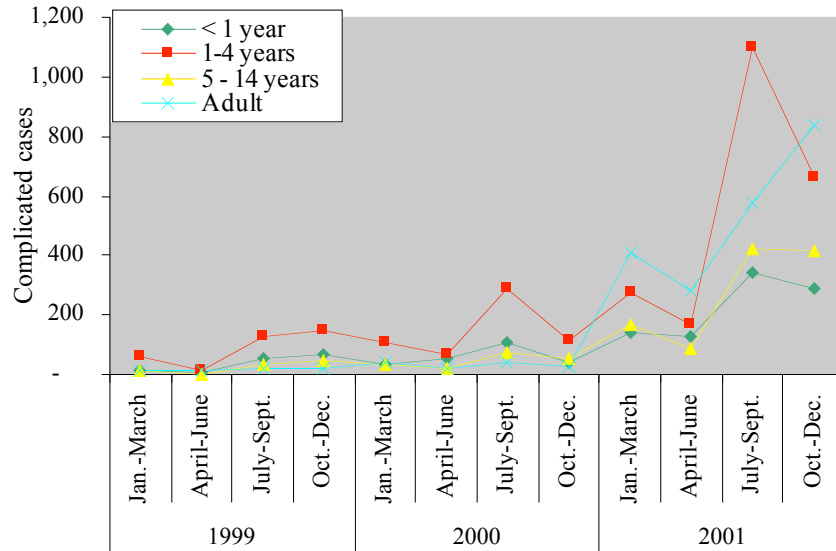

4d) Secteur 30

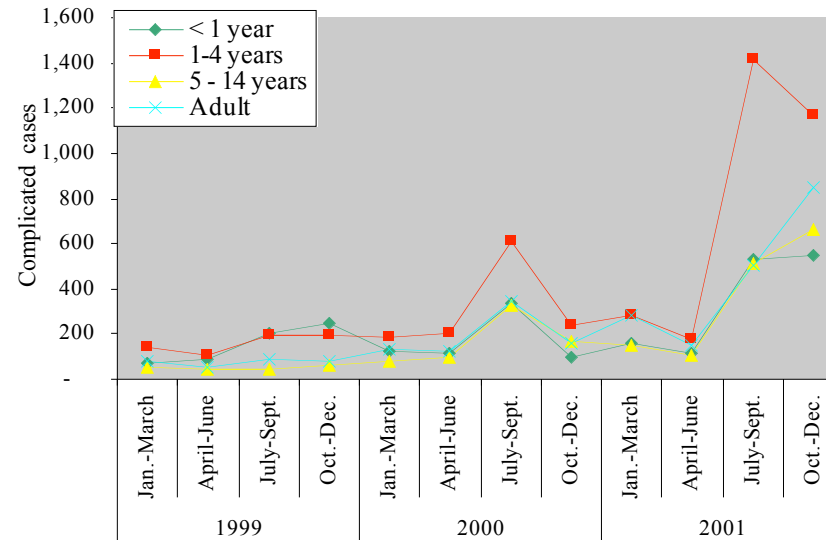

Supplement: MOESM6 [file 9547018]
